# Supplementary material for: Molecular signature associated with cladribine treatment in patients with multiple sclerosis
Source: PubMed Central journal article supplement (PMC10408299; doi:10.3389/fimmu.2023.1233546), 2023-07-25
Supplement: DataSheet_1.pdf [file DataSheet_1.pdf]

Table S1: List of genes selected by the OMICS analysis and represented in the loading plots

| Entrez | value.var    | Affymetrix.ID     | Gene.Symbol |
|--------|--------------|-------------------|-------------|
| 1435   | 0.478684712  | TC0100009364.hg.1 | CSF1        |
| 57178  | 0.456459101  | TC1000008182.hg.1 | ZMIZ1       |
| 10215  | 0.345191257  | TC2100006948.hg.1 | OLIG2       |
| 64446  | -0.291058409 | TC1700008845.hg.1 | DNAI2       |
| 11217  | 0.228936011  | TC0900012157.hg.1 | AKAP2       |
| 10184  | 0.199913828  | TC0500011225.hg.1 | LHFPL2      |
| 10512  | 0.180104809  | TC0700011626.hg.1 | SEMA3C      |
| 7067   | 0.172098143  | TC1700007777.hg.1 | THRA        |
| 165904 | 0.152071635  | TC0300010772.hg.1 | XIRP1       |
| 10257  | 0.146405443  | TC1300009505.hg.1 | ABCC4       |
| 444    | 0.144397912  | TC0800010607.hg.1 | ASPH        |
| 57182  | 0.135624604  | TC0400011791.hg.1 | ANKRD50     |
| 6793   | 0.129910159  | TC0500012818.hg.1 | STK10       |
| 51192  | -0.118430998 | TC1600011408.hg.1 | CKLF        |
| 85406  | 0.115811303  | TC1200012800.hg.1 | DNAJC14     |
| 1879   | 0.109975405  | TC0500012631.hg.1 | EBF1        |
| 5176   | -0.107361863 | TC1700006524.hg.1 | SERPINF1    |
| 23533  | 0.1036673    | TC1700009708.hg.1 | PIK3R5      |
| 586    | 0.094972391  | TC1200010145.hg.1 | BCAT1       |
| 1827   | 0.073212179  | TC2100008030.hg.1 | RCAN1       |
| 4327   | 0.063847356  | TC1200010874.hg.1 | MMP19       |
| 200734 | 0.0637274    | TC0200012863.hg.1 | SPRED2      |
| 51384  | 0.062453587  | TC0700008930.hg.1 | WNT16       |
| 6097   | 0.049229783  | TC0100018491.hg.1 | RORC        |
| 3082   | 0.046664223  | TC0700011642.hg.1 | HGF         |
| 8829   | 0.041066128  | TC1000010273.hg.1 | NRP1        |
| 6722   | -0.040657997 | TC0600008073.hg.1 | SRF         |
| 9467   | 0.040260335  | TC0300010399.hg.1 | SH3BP5      |
| 123    | 0.035078644  | TC0900012212.hg.1 | PLIN2       |
| 272    | 0.034801966  | TC1100012962.hg.1 | AMPD3       |
| 284611 | 0.033775905  | TC0100009324.hg.1 | FAM102B     |
| 6446   | 0.026225931  | TC0600013231.hg.1 | SGK1        |
| 2012   | 0.021607218  | TC1200006909.hg.1 | EMP1        |
| 6347   | 0.019597783  | TC1700007557.hg.1 | CCL2        |
| 83985  | 0.015693664  | TC1600011367.hg.1 | SPNS1       |
| 116448 | 0.012968263  | TC2100006951.hg.1 | OLIG1       |
| 84669  | 0.011479718  | TC1700011313.hg.1 | USP32       |
| 10261  | 0.005331222  | TC1600009683.hg.1 | IGSF6       |
| 79760  | -0.004461765 | TC1900011764.hg.1 | GEMIN7      |
| 6696   | 0.004248197  | TC0400008091.hg.1 | SPP1        |

<sup>a</sup>Entrez gene ID, <sup>b</sup>value.var.: variation of each feature in reference to the untreated group.

Table S2: List of proteins selected by the OMICS analysis and represented in the loading plots

| Accession | value.var    | Description                                             |
|-----------|--------------|---------------------------------------------------------|
| P38936    | 0.647292706  | Cyclin-dependent kinase inhibitor 1                     |
| Q96I15    | 0.387750448  | Selenocysteine lyase                                    |
| Q96CV9    | -0.278955259 | Optineurin                                              |
| P02787    | -0.22174707  | Serotransferrin                                         |
| Q3MHD2    | -0.219946069 | Protein LSM12 homolog                                   |
| P53990    | 0.216218487  | IST1 homolog                                            |
| P36405    | -0.210136599 | ADP-ribosylation factor-like protein 3                  |
| P25311    | -0.201198657 | Zinc-alpha-2-glycoprotein                               |
| P49792    | 0.190534159  | E3 SUMO-protein ligase RanBP2                           |
| Q92918    | 0.180719619  | Mitogen-activated protein kinase kinase kinase kinase 1 |
| P02768    | -0.149878    | Serum albumin                                           |
| Q14254    | 0.117674384  | Flotillin-2                                             |
| P02775    | -0.104615506 | Platelet basic protein                                  |
| P02675    | -0.063366876 | Fibrinogen beta chain                                   |
| P00738    | -0.042850314 | Haptoglobin                                             |
| Q8N6H7    | 0.030494221  | ADP-ribosylation factor GTPase-activating protein 2     |
| P20700    | 0.018808144  | Lamin-B1                                                |
| Q96RQ9    | 0.017797303  | L-amino-acid oxidase                                    |
| P49790    | 0.015130461  | Nuclear pore complex protein Nup153                     |
| P42330    | 0.003192348  | Aldo-keto reductase family 1 member C3                  |

<sup>a</sup>Accession number, <sup>b</sup>value.var.: variation of each feature in reference to the untreated group.

Table S3: List of miRNAs selected by the OMICS analysis and represented in the loading plots

| Accession       | value.var    | ProbesetName         | Symbol          |
|-----------------|--------------|----------------------|-----------------|
| MIMAT0000084    | 0.392599512  | MIMAT0000084_st      | hsa-miR-27a-3p  |
| MIMAT0000069    | 0.300384723  | MIMAT0000069_st      | hsa-miR-16-5p   |
| MIMAT0000440    | -0.291111425 | MIMAT0000440_st      | hsa-miR-191-5p  |
| MI0003684       | 0.275207376  | MI0003684_st         | hsa-mir-660     |
| MIMAT0027629    | -0.259652678 | MIMAT0027629_st      | hsa-miR-6864-3p |
| MIMAT0019764    | 0.234374994  | MIMAT0019764_st      | hsa-miR-4680-5p |
| MI0025753       | 0.225936891  | MI0025753_st         | hsa-mir-7977    |
| MI0017281       | 0.224457552  | MI0017281_st         | hsa-mir-4653    |
| MIMAT0000692    | 0.215815857  | MIMAT0000692_st      | hsa-miR-30e-5p  |
| MIMAT0000510    | -0.189059232 | MIMAT0000510_st      | hsa-miR-320a    |
| MIMAT0000087    | 0.171800147  | MIMAT0000087_st      | hsa-miR-30a-5p  |
| ENSG00000252050 | -0.158474868 | ENSG00000252050_st   | ENSG00000252050 |
| MI0003173       | -0.158387127 | MI0003173_x_st       | hsa-mir-518a-2  |
| MIMAT0004949    | -0.155554955 | MIMAT0004949_st      | hsa-miR-877-5p  |
| MIMAT0003888    | -0.142758784 | MIMAT0003888_st      | hsa-miR-766-3p  |
| MIMAT0016861    | 0.140590149  | MIMAT0016861_st      | hsa-miR-4308    |
| ENSG00000238935 | -0.135590186 | ENSG00000238935_s_st | ENSG00000238935 |
| MIMAT0000086    | 0.130087364  | MIMAT0000086_st      | hsa-miR-29a-3p  |
| ENSG00000239038 | -0.122179261 | ENSG00000239038_x_st | ENSG00000239038 |
| MIMAT0000068    | 0.117575278  | MIMAT0000068_st      | hsa-miR-15a-5p  |
| MIMAT0022487    | -0.110763489 | MIMAT0022487_st      | hsa-miR-5694    |
| SNORD126        | -0.106220614 | SNORD126_st          | SNORD126        |
| MIMAT0027570    | 0.100715296  | MIMAT0027570_st      | hsa-miR-6835-5p |
| MIMAT0019785    | -0.090003666 | MIMAT0019785_st      | hsa-miR-4693-3p |
| MI0015828       | -0.087612316 | MI0015828_st         | hsa-mir-4301    |
| MI0006318       | -0.082736576 | MI0006318_st         | hsa-mir-1228    |
| ENSG00000201619 | -0.082723061 | ENSG00000201619_st   | ENSG00000201619 |
| MIMAT0004748    | -0.072955494 | MIMAT0004748_st      | hsa-miR-423-5p  |
| MIMAT0000680    | 0.06757155   | MIMAT0000680_st      | hsa-miR-106b-5p |
| MIMAT0005929    | -0.042643135 | MIMAT0005929_st      | hsa-miR-1275    |
| ENSG00000238294 | 0.040300787  | ENSG00000238294_st   | ENSG00000238294 |
| MIMAT0022472    | -0.031086085 | MIMAT0022472_st      | hsa-miR-5683    |
| MIMAT0005792    | -0.030760327 | MIMAT0005792_st      | hsa-miR-320b    |
| MIMAT0000073    | 0.029585586  | MIMAT0000073_st      | hsa-miR-19a-3p  |
| MIMAT0005793    | -0.026810323 | MIMAT0005793_st      | hsa-miR-320c    |
| MI0006391       | -0.022183805 | MI0006391_st         | hsa-mir-1257    |
| MIMAT0022967    | -0.017741807 | MIMAT0022967_st      | hsa-miR-3620-5p |
| ENSG00000239171 | -0.007851521 | ENSG00000239171_st   | ENSG00000239171 |
| MIMAT0018086    | -0.005728448 | MIMAT0018086_st      | hsa-miR-3664-5p |
| MIMAT0005875    | 0.00572813   | MIMAT0005875_st      | hsa-miR-548j-5p |

<sup>a</sup>Accession number, <sup>b</sup>value.var.: variation of each feature in reference to the untreated group. Probeset Name<sup>c</sup>

Figure S1

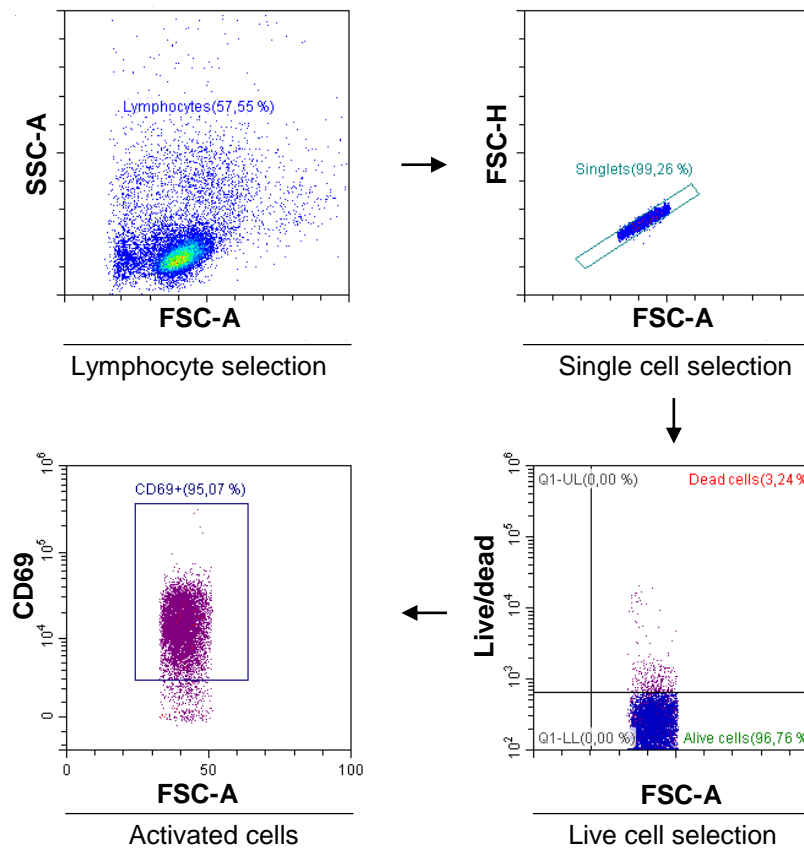

**Figure S1:** Activation status test by flow cytometry. Dot plots showing the gating strategy used to evaluate the activation of PBMCs. Lymphocytes were defined by SSC-Area and FSC-Area. Doublets (FSC-H and FSC-A gating), alive cells (fixable viability stain) were included in the analysis. Activation of PBMCs was analyzed by means of CD69 staining. A representative sample of PBMCs stimulated with PMA/ionomycin and simultaneously treated with 0.1  $\mu\text{M}$  cladribine is shown.

Figure S2

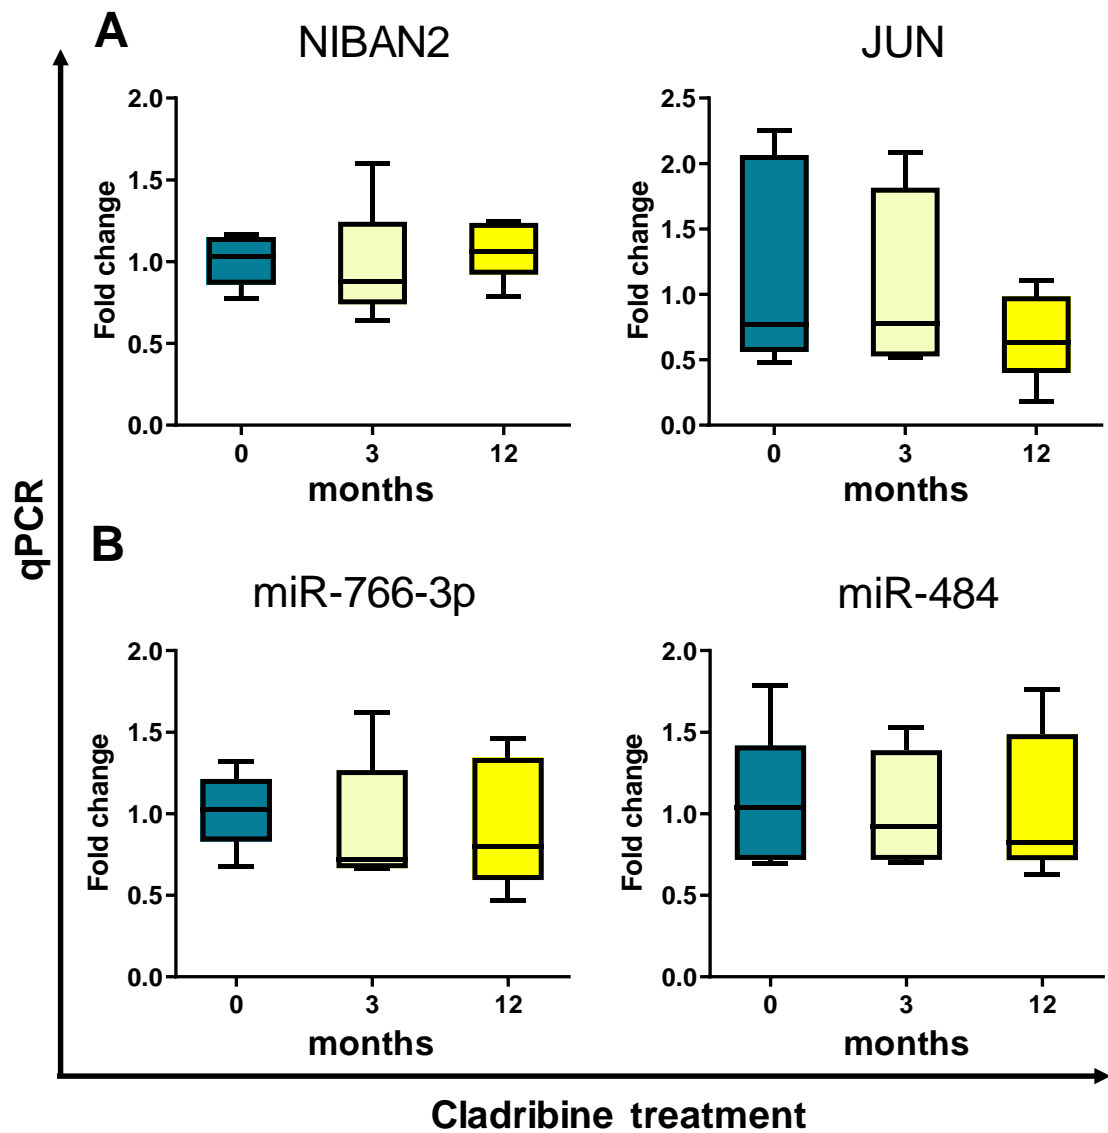

**Figure S2:** *Ex vivo* validation of selected candidate biomarkers by qPCR. Expression levels of the genes *NIBAN2* and *JUN* and the miRNAs *miR-766-3p* and *miR-484* were determined by qPCR in samples obtained from PBMCs of MS patients (N=5) treated with cladribine at baseline and after 3 and 12 months of treatment. Graphs are expressed as fold-change in gene and miRNA expression relative to baseline. *NIBAN2*: niban apoptosis regulator 2. *JUN*: Transcription factor Jun.

Figure S3

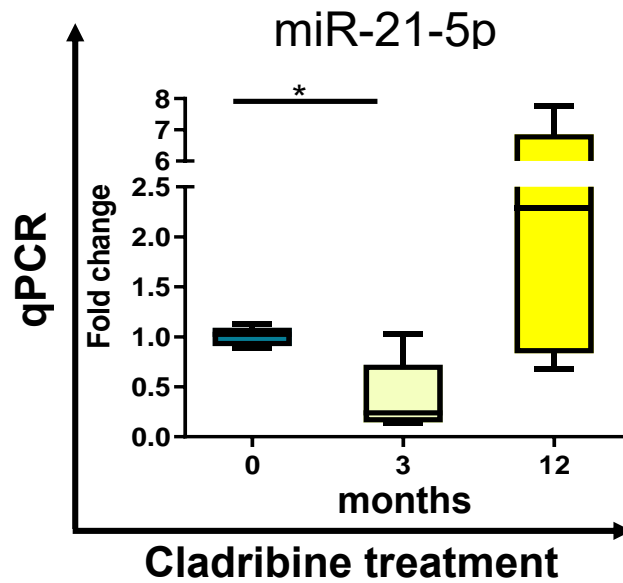

**Figure S3:** *Ex vivo* validation of *miR-21-5p* by qPCR. Expression levels of the miRNA *miR-21-5p* were determined by qPCR in samples obtained from PBMCs of MS patients (N=5) treated with cladribine at baseline and after 3 and 12 months of treatment. Graphs are expressed as fold-change in miRNA expression relative to baseline. \*p-value <0.05, (One-way ANOVA with repeated measures following a Dunnett multiple comparisons test, taking the baseline condition as reference). A y-axis segmentation was performed to represent better high and low levels.

## Supplementary Methods

### Flow Cytometry

After *in vitro* stimulation with PMA/Ionomycin and simultaneous treatment with cladribine,  $3 \times 10^5$  PBMCs were harvested and stained for flow cytometry analysis in order to test cell activation by means of CD69 expression. PBMCs were stained using a fluorochrome-conjugated antibody against CD69 (Ref. 555533, BD Biosciences, San Jose, CA, USA). Discrimination of dead cells was achieved by Fixable Viability Stain (eBioscience, San Diego, CA, USA). Samples were acquired with a Cyto FLEX flow cytometer (Beckman Coulter, Brea, CA, USA) and data were analyzed with CytExpert 2.3 software (Beckman Coulter)
